# Supplementary material
Source: Royal Society of Chemistry journal article supplement (doi:10.1039/d6py00158k)
Supplement: d6py00158k1.pdf [file d6py00158k1.pdf]

## SUPPORTING INFORMATION

---

### SUPPORTING INFORMATION

for

## **Plasmonic Enhancement of Semiconducting Double Cable Polythiophene-Perylene Diimide Polymer Performance in Artificial Photosynthesis of H<sub>2</sub>O<sub>2</sub>**

*Faseeh Akbar<sup>†a</sup>, Shahryar Rasheed<sup>a</sup>, Sana Iqbal<sup>a</sup>, Shiza Basit<sup>a</sup>, Sumera Siddique<sup>b</sup>, Ishtiaq Ahmed<sup>c</sup>,  
Ljiljana Fruk<sup>c</sup>, and Basit Yameen<sup>\*a</sup>*

\*E-mail: [basit.yameen@lums.edu.pk](mailto:basit.yameen@lums.edu.pk)

[a] Department of Chemistry and Chemical Engineering, Syed Babar Ali School of Science and Engineering (SBASSE), Lahore University of Management Sciences (LUMS), Lahore-54792, Pakistan.

[b] Department of Physics, Syed Babar Ali School of Science and Engineering (SBASSE), Lahore University of Management Sciences (LUMS), Lahore-54792, Pakistan.

[c] Department of Chemical Engineering and Biotechnology, University of Cambridge. Philippa Fawcett Drive, CB3 0AS Cambridge, UK.

**KEYWORDS:** Artificial photosynthesis, Semiconducting polymers, Plasmonic nanoparticle, Double-cable polymers, Photocatalysis, Solar fuels.

## Contents

|     |                                                                                                                                                                                                                                                                                                    |     |
|-----|----------------------------------------------------------------------------------------------------------------------------------------------------------------------------------------------------------------------------------------------------------------------------------------------------|-----|
| 1.  | 1. Scheme, Spectra, Structures and Figures/Images.....                                                                                                                                                                                                                                             | S3  |
| 2.  | Scheme S1 Synthetic route for the preparation of poly-3-hexylthiophene (P3HT) and the donor-acceptor covalent conjugate (PTh-PDI-DCP). .....                                                                                                                                                       | S3  |
| 3.  | 2. Characterizations (GPC, ATR-FTIR and <sup>1</sup> H NMR) and Fig. S1 .....                                                                                                                                                                                                                      | S3  |
| 4.  | 3. Band-gap calculations .....                                                                                                                                                                                                                                                                     | S5  |
| 5.  | Fig. S2 (a, b, c) UV/Visible spectrum, Tauc plot and cyclic voltammogram of polythiophene (PTh); (d, e, f) are the UV/Visible spectrum, Tauc plot and cyclic voltammogram of perylene diimide (PDI). .....                                                                                         | S5  |
| 6.  | Table S1 Summary of the amount of AuNPs transferred to the polymer solution upon addition of different volumes of AuNP suspension and their corresponding content in the polymer/AuNP hybrids. Amounts of Au were estimated using ICP-OES.....                                                     | S5  |
| 7.  | Fig. S3 Photoelectrochemical (PEC) performance of P3HT and PTh-PDI-DCP with varying AuNP wt.%... ..                                                                                                                                                                                                | S6  |
| 8.  | Fig. S4 UV/Visible absorption spectra of P3HT/AuNP hybrids (A) and PTh-PDI-DCP/AuNP hybrids (B), along with the corresponding shift in $\lambda_{\text{max}}$ extracted from the UV/visible spectra of polymer/AuNP hybrids as a function of variable AuNP wt.% (C). .....                         | S7  |
| 9.  | Fig. S5 Steady-state photoluminescence (PL) spectra of (A) P3HT and P3HT/AuNP hybrids with varying AuNP weight percentages (wt.%) and (B) PTh-PDI-DCP and PTh-PDI-DCP/AuNP hybrids with different AuNP contents (wt.%) in the polymer/AuNP hybrid systems.....                                     | S7  |
| 10. | Fig. S6 GI-XRD patterns of AuNPs, P3HT and PTh-PDI-DCP, P3HT/AuNPs and PTh-PDI-DCP/AuNPs films deposited on Si wafers. ....                                                                                                                                                                        | S8  |
| 11. | Fig. S7 Raman spectra of AuNPs, P3HT, P3HT/AuNPs, PTh-PDI-DCP and PTh-PDI-DCP/AuNPs films. ....                                                                                                                                                                                                    | S8  |
| 12. | Fig. S8 Cross-sectional SEM images showing the film thicknesses of (A) AuNPs, (B) P3HT, (C) P3HT/AuNPs, (D) PTh-PDI-DCP and (E) PTh-PDI-DCP/AuNPs thin films. ....                                                                                                                                 | S9  |
| 13. | Fig. S9 Diagrammatical representation of EIS circuit fitting from Nyquist plots (Fig. 3f) for the PTh-PDI-DCP/AuNPs in the dark (a) and under illumination (b). .....                                                                                                                              | S9  |
| 14. | Fig. S10 CVs of the PTh-PDI-DCP/AuNPs hybrid after 50 consecutive cycles recorded in the dark (A) and under illumination (B) which reveal a decrease in current density of ~14% and 27%, respectively, indicating the PTh-PDI-DCP/AuNPs hybrid performance degradation under both conditions. .... | S10 |
| 15. | 4. Photocatalytic H <sub>2</sub> O <sub>2</sub> production .....                                                                                                                                                                                                                                   | S10 |
| 16. | 5. ATR-FTIR spectra of the photocatalysts loaded on PVDF membranes .....                                                                                                                                                                                                                           | S11 |
| 17. | Fig. S11 ATR-FTIR spectra of pristine porous PVDF membrane and PVDF membranes loaded with AuNPs, P3HT, P3HT/AuNPs, PTh-PDI-DCP and PTh-PDI-DCP/AuNPs. ....                                                                                                                                         | S11 |
| 18. | Fig. S12 Calibration curve generated using known molar concentrations prepared from a 35% commercially available H <sub>2</sub> O <sub>2</sub> solution.....                                                                                                                                       | S11 |
| 19. | Table S2 H <sub>2</sub> O <sub>2</sub> is produced ( $\mu\text{Mmg}^{-1}\text{h}^{-1}$ ) by each photocatalyst over 10 photocatalytic cycles in triplicate. ..                                                                                                                                     | S12 |
| 20. | Table S3 Mechanistic studies for the artificial photosynthesis of H <sub>2</sub> O <sub>2</sub> during 5 repeated cycles in triplicates. S13                                                                                                                                                       |     |
| 21. | Table S4 The percentage (%) decrease in H <sub>2</sub> O <sub>2</sub> concentration was determined based on mechanistic studies of H <sub>2</sub> O <sub>2</sub> .....                                                                                                                             | S14 |
| 22. | Table S5 List of reported photocatalysts and their photocatalytic activity for the H <sub>2</sub> O <sub>2</sub> production. ....                                                                                                                                                                  | S14 |
| 23. | 6. References .....                                                                                                                                                                                                                                                                                | S17 |

## SUPPORTING INFORMATION

### 1. Scheme, Spectra, Structures and Figures/Images

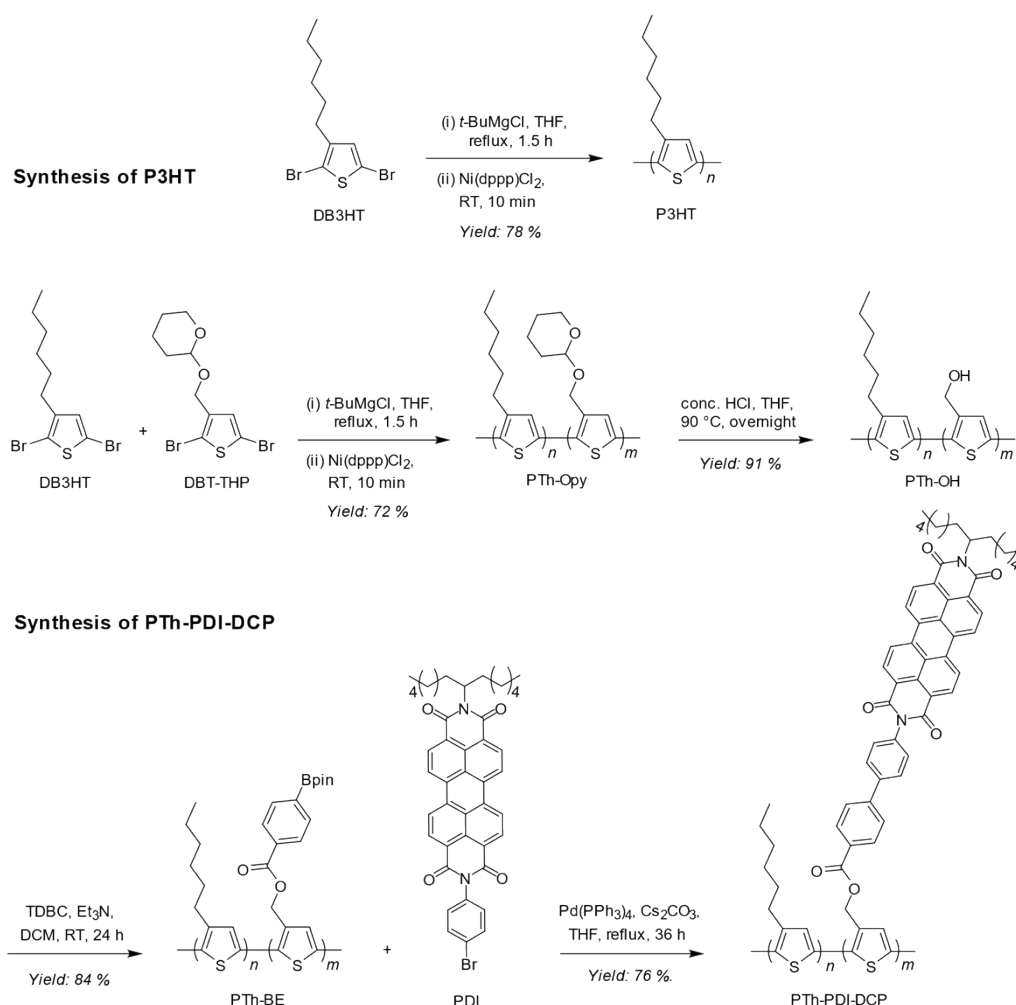

**Scheme S1** Synthetic route for the preparation of poly-3-hexylthiophene (P3HT) and the donor-acceptor covalent conjugate (PTh-PDI-DCP).

### 2. Characterizations (GPC, ATR-FTIR and $^1\text{H}$ NMR)

Gel permeation chromatography (GPC) confirmed the incorporation of perylene diimide (PDI) units onto the side chains of the polythiophene (PTh) backbone as evidenced by increased molecular weight and lower retention time of PTh-PDI-DCP. The number average molecular weight ( $M_n$ ) evolved from 6,700 Da ( $D = 1.10$ ) for PTh-Opy to 6,200 Da ( $D = 1.05$ ) after removal of -Opy groups (PTh-OH) followed by an increase to 7,900 Da ( $D = 1.05$ ) for PTh-BE and 10,900 Da ( $D = 1.07$ ) for PTh-PDI-DCP confirming successful grafting of PDI units (Fig. S1a). ATR-FTIR spectroscopy further supported functionalization with characteristic PDI bands at  $1690$  and  $1610\text{ cm}^{-1}$  corresponding to amide  $\text{C}=\text{O}$  stretching and aromatic  $\text{C}=\text{C}$  vibrations, respectively (Fig. S1b). The  $^1\text{H}$  NMR spectra of P3HT and PDI displayed their characteristic signals. For P3HT, the thiophene proton h appears at 6.9 ppm, the  $\alpha$ -alkyl protons f at 2.8 ppm and remaining alkyl protons a-e at 0.7-1.9 ppm (Fig. S1c). PDI shows aromatic protons at 7-9 ppm, a methine proton r at 5.2 ppm and alkyl chain protons at 0.8-2.3 ppm (Fig. S1d). The  $^1\text{H}$  NMR spectrum of PTh-PDI-DCP further confirms PDI incorporation with characteristic aromatic signals ( $\delta = 7.5\text{-}9.0$  ppm). Signal integration indicates  $\sim 13\%$  functionalization of PTh side chains with PDI units (Fig. S1e, *detailed discussion provided in the main manuscript*).

# SUPPORTING INFORMATION

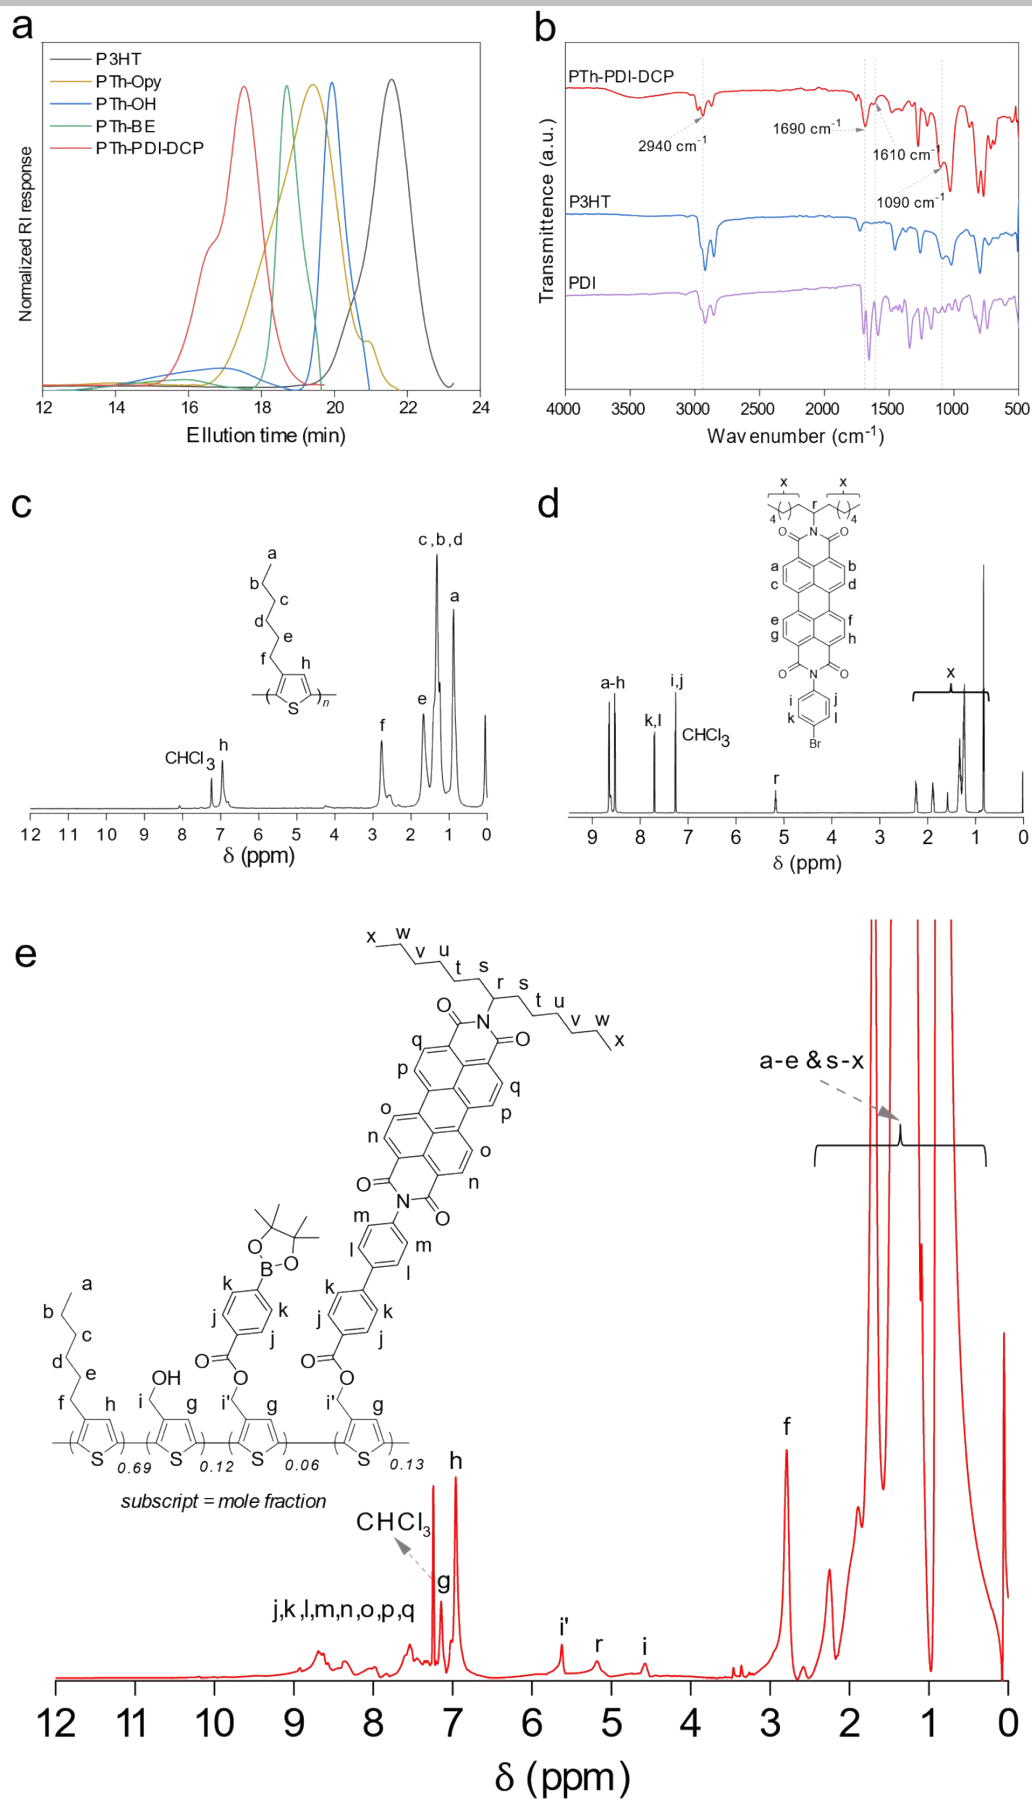

**Fig. S1** (a) GPC profiles; (b) ATR-FTIR spectra of P3HT, PDI and PTh-PDI-DCP; (c, d, e)  $^1\text{H}$  NMR spectra; P3HT (c), PDI (d) and PTh-PDI-DCP (e).

## SUPPORTING INFORMATION

### 3. Band-gap calculations

The optical band gaps of PTh and PDI were determined by constructing Tauc plots derived from their corresponding UV/Vis absorption spectra. The frontier molecular orbital (FMO) energy levels were estimated through cyclic voltammetry (CV) measurements with all potentials referenced against the ferrocene/ferrocenium (Fc/Fc<sup>+</sup>) redox couple as an internal standard. The HOMO energy levels were calculated using Eq. S1 while the LUMO energy levels were determined using Eq. S2. The UV/Vis absorption spectra, Tauc plots and cyclic voltammograms of PTh and PDI are presented in Fig. S2.

$$E_{\text{HOMO}} = - \left[ \left( P_{\text{oxi compound}} - P_{\text{red Fc}} \right) + 4.8 \right] \text{eV} \quad \text{Eq. S1}$$

$$E_{\text{HOMO}} = E_{\text{LUMO}} - E_g \quad \text{Eq. S2}$$

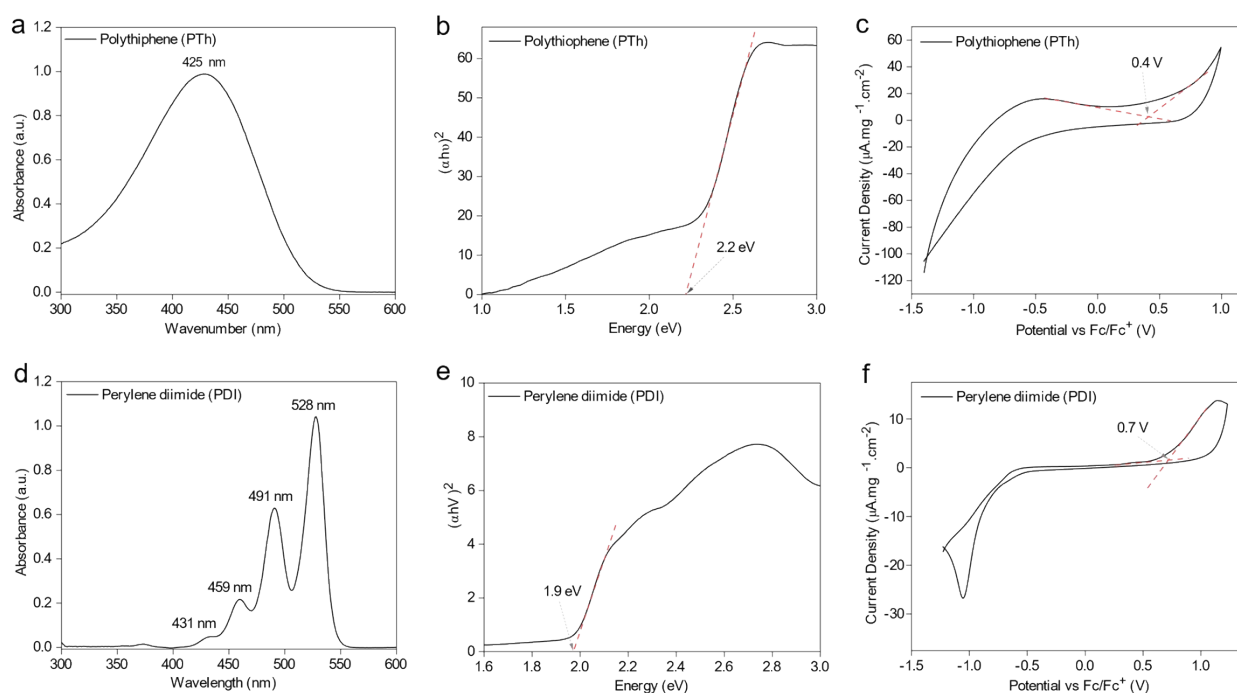

**Fig. S2** (a, b, c) UV/Visible spectrum, Tauc plot and cyclic voltammogram of polythiophene (PTh); (d, e, f) UV/Visible spectrum, Tauc plot and cyclic voltammogram of perylene diimide (PDI).

**Table S1** Summary of the amount of AuNPs transferred to the polymer solution upon addition of different volumes of AuNP suspension and their corresponding content in the polymer/AuNP hybrids. Amounts of Au were estimated using ICP-OES.

| Serial no. | Volume of AuNPs suspensions (mL) with corresponding masses (mg) of AuNPs | Amount of AuNPs transferred to P3HT (mg) | Wt.% of AuNPs in P3HT/AuNPs hybrid | Amount of AuNPs transferred to PTh-PDI-DCP (mg) | Wt.% of AuNPs in PTh-PDI-DCP/AuNPs hybrid |
|------------|--------------------------------------------------------------------------|------------------------------------------|------------------------------------|-------------------------------------------------|-------------------------------------------|
| 1          | 5.0 mL / 2.3 mg                                                          | 0.03 ± 0.01                              | 3 ± 1                              | 0.10 ± 0.01                                     | 9 ± 1                                     |
| 2          | 7.5 mL / 3.4 mg                                                          | 0.06 ± 0.015                             | 6 ± 1.5                            | 0.12 ± 0.01                                     | 11 ± 1                                    |
| 3          | 10.0 mL / 4.5 mg                                                         | 0.12 ± 0.01                              | 10 ± 1                             | 0.15 ± 0.01                                     | 13 ± 1                                    |
| 4          | 12.5 mL / 5.6 mg                                                         | 0.19 ± 0.04                              | 16 ± 3                             | 0.23 ± 0.025                                    | 19 ± 3                                    |
| 5          | 15.0 mL / 6.7 mg                                                         | 0.24 ± 0.03                              | 19 ± 2.5                           | 0.33 ± 0.03                                     | 25 ± 3                                    |

## SUPPORTING INFORMATION

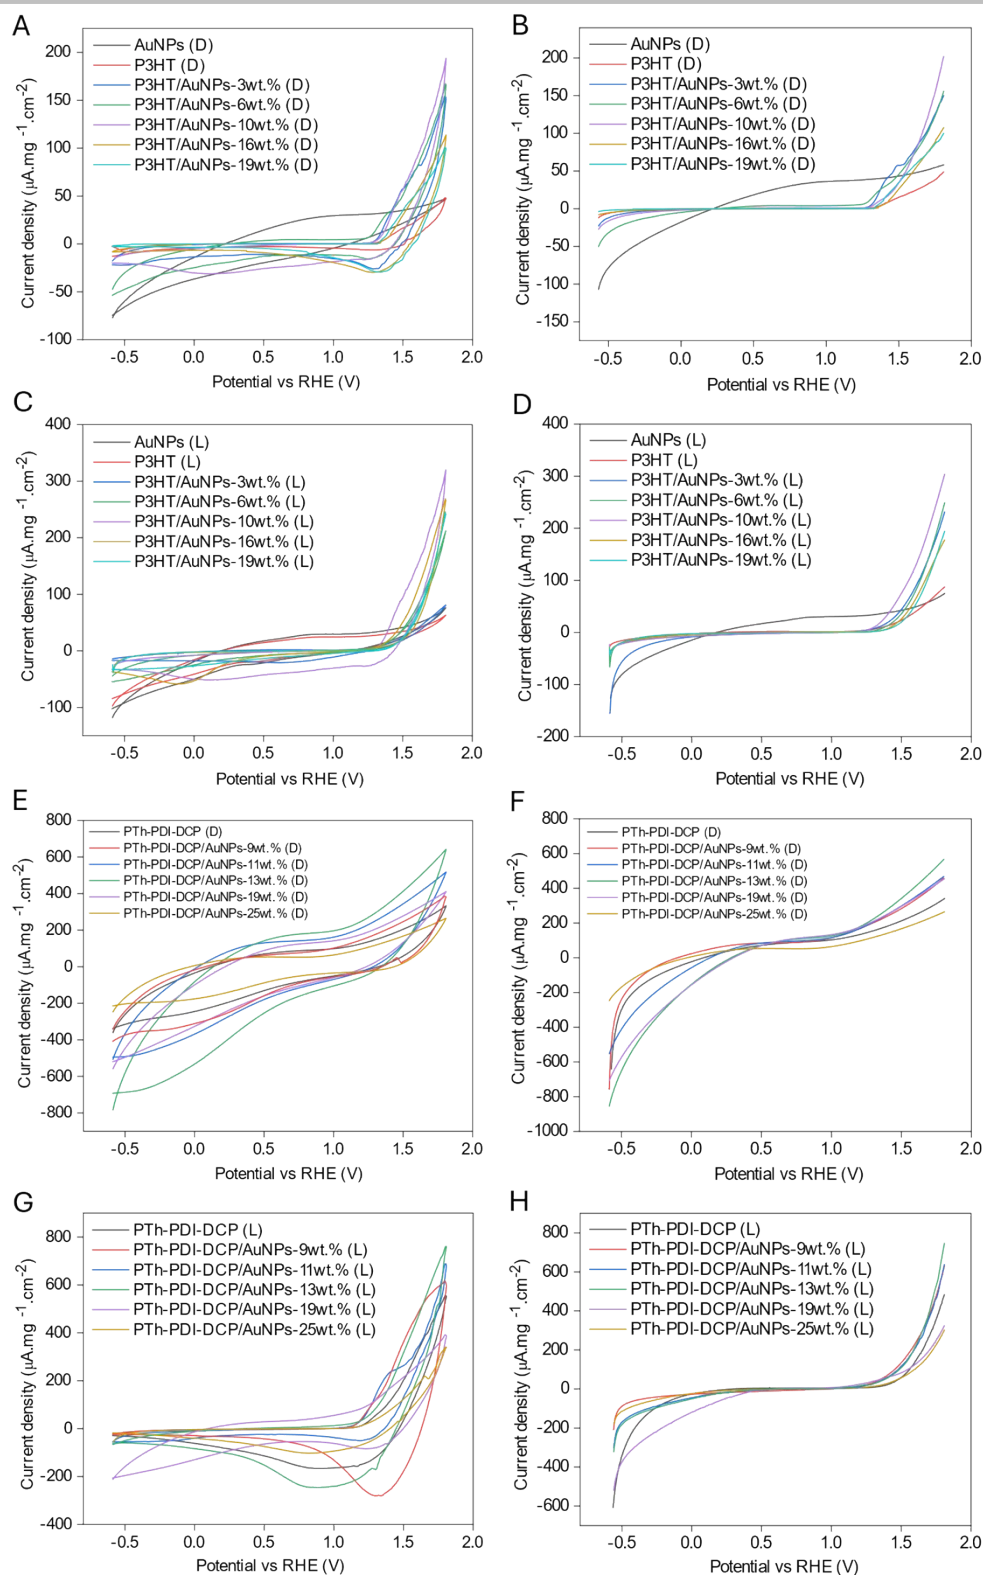

**Fig. S3** Photoelectrochemical (PEC) performance of P3HT and PTh-PDI-DCP with varying AuNP wt.%. Cyclic voltammograms (CVs) (A) and linear sweep voltammograms (LSVs) (B) of AuNPs, pristine P3HT and P3HT/AuNP hybrids with different AuNP loadings (wt.%) recorded under dark conditions; CVs (C) and LSVs (D) of the same systems under illumination. CVs (E) and LSVs (F) of pristine PTh-PDI-DCP and PTh-PDI-DCP/AuNP hybrids with varying AuNP content (wt.%) measured in the dark; CVs (G) and LSVs (H) of the corresponding systems under illumination.

## SUPPORTING INFORMATION

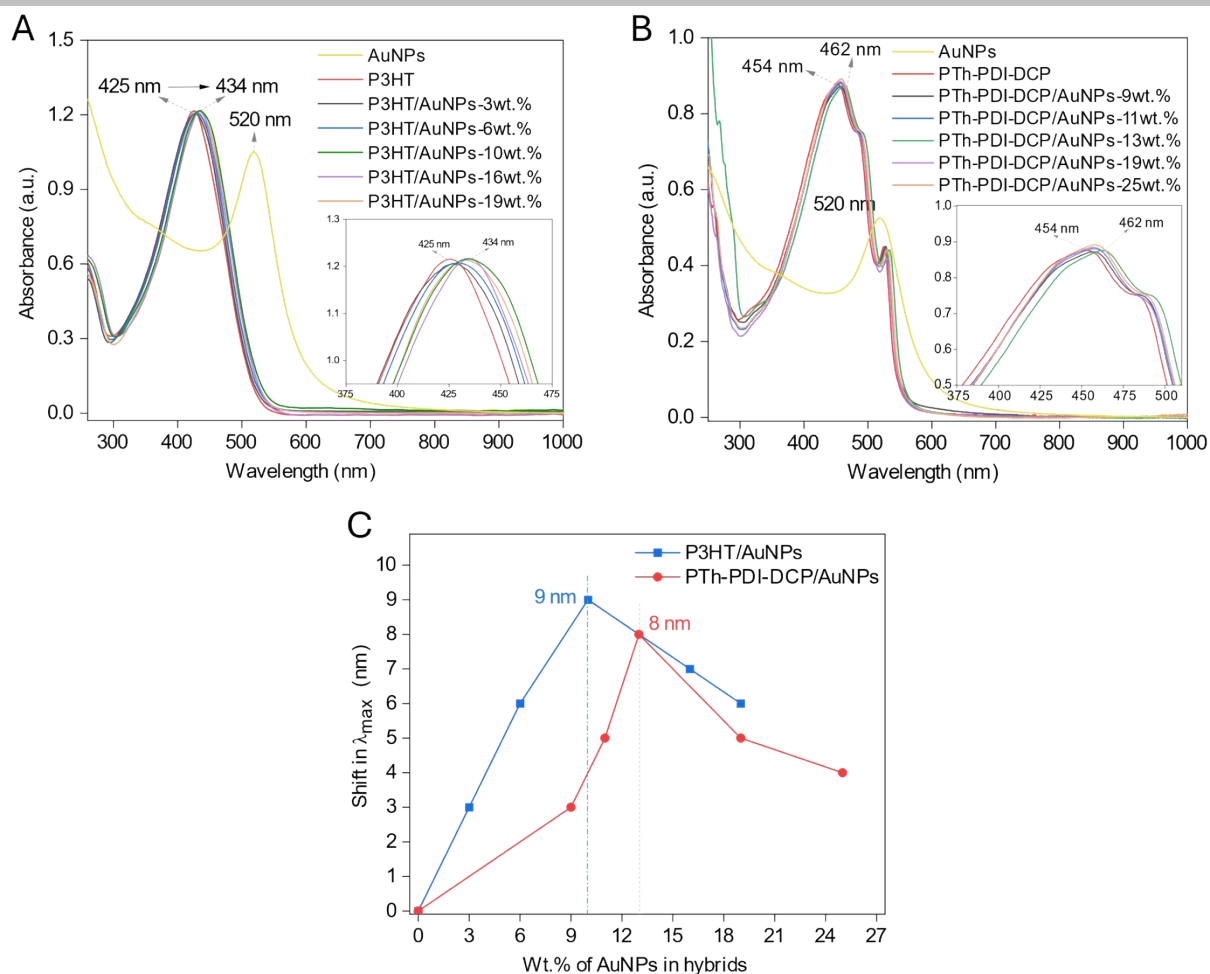

**Fig. S4** UV/Visible absorption spectra of P3HT/AuNP hybrids (A) and PTh-PDI-DCP/AuNP hybrids (B), along with the corresponding shift in  $\lambda_{\max}$  extracted from the UV/visible spectra of polymer/AuNP hybrids as a function of variable AuNP wt.% (C).

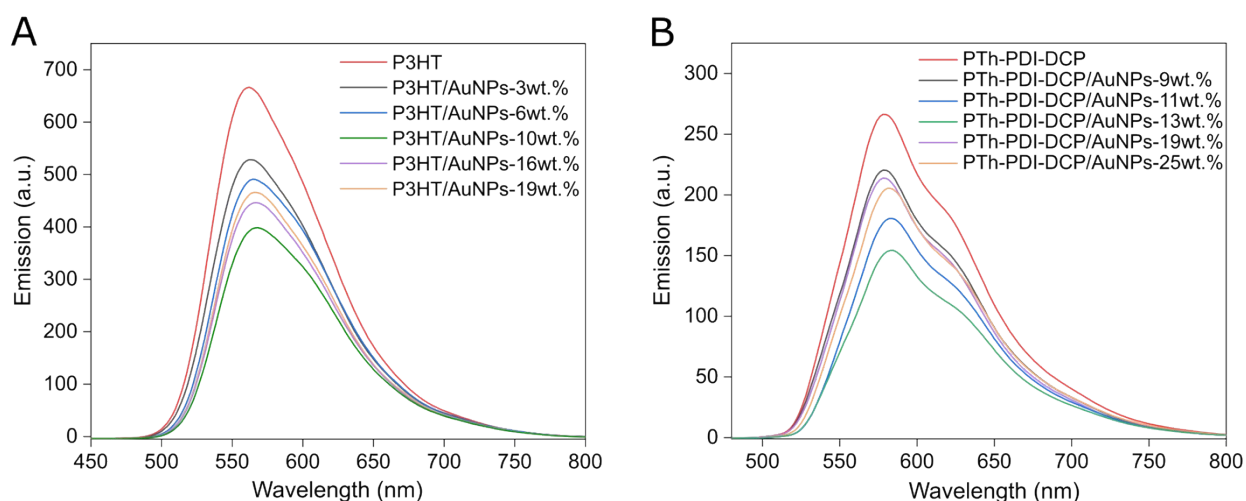

**Fig. S5** Steady-state photoluminescence (PL) spectra of (A) P3HT and P3HT/AuNP hybrids with varying AuNP weight percentages (wt.%) and (B) PTh-PDI-DCP and PTh-PDI-DCP/AuNP hybrids with different AuNP contents (wt.%) in the polymer/AuNP hybrid systems.

## SUPPORTING INFORMATION

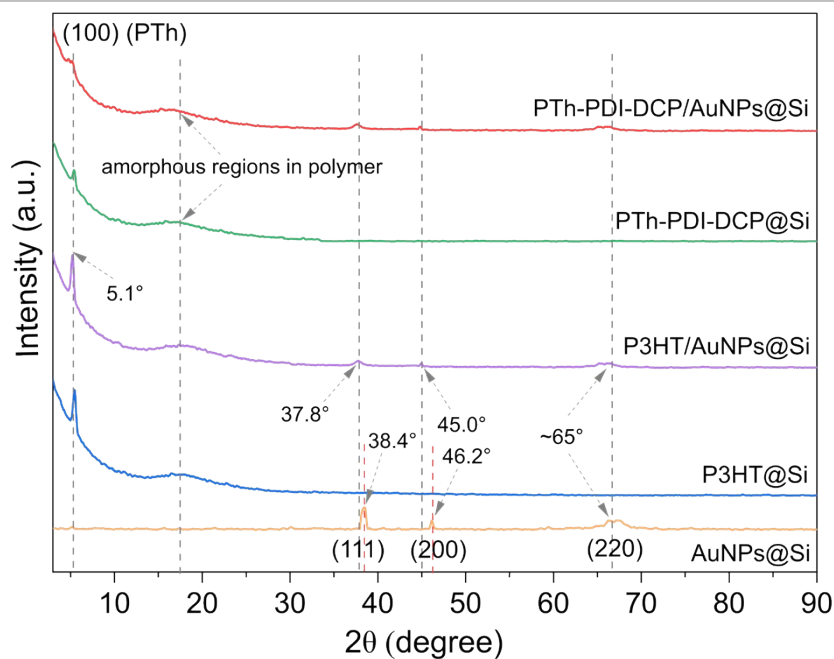

**Fig. S6** GI-XRD patterns of AuNPs, P3HT and PTh-PDI-DCP, P3HT/AuNPs and PTh-PDI-DCP/AuNPs films deposited on Si wafers.

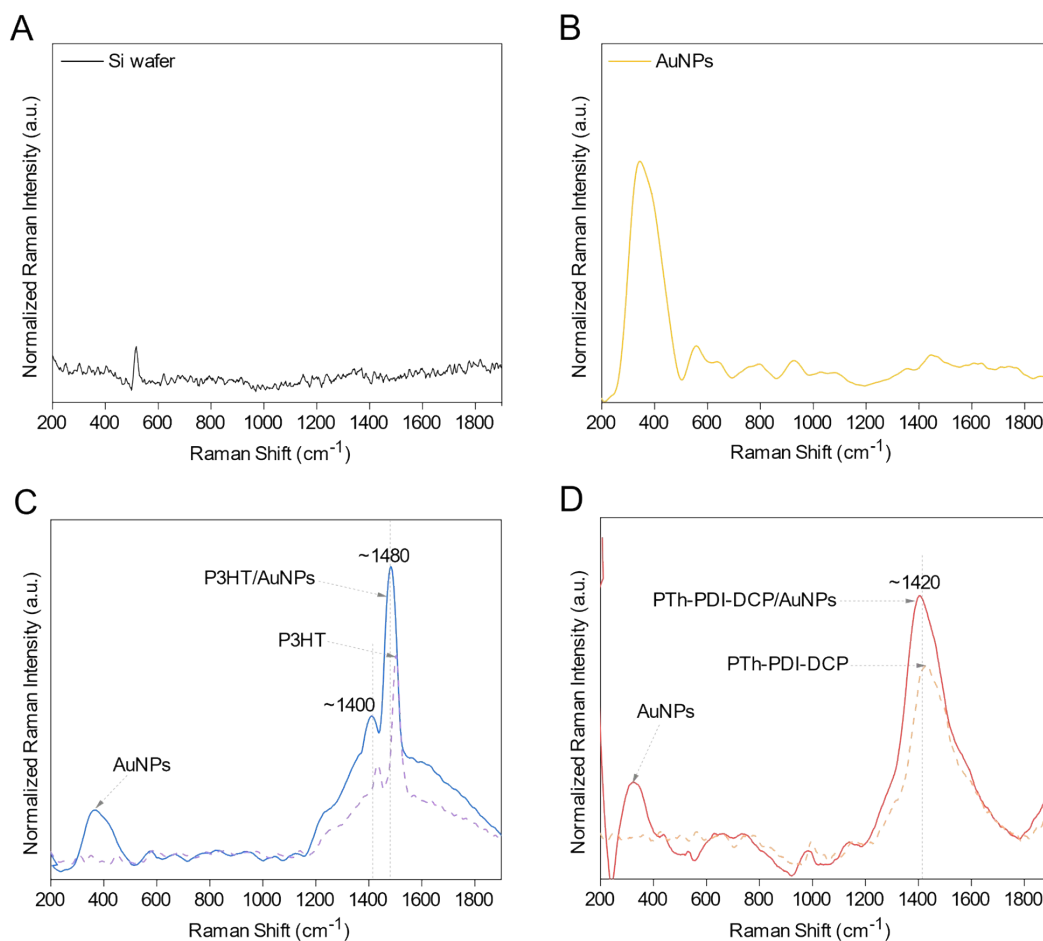

**Fig. S7** Raman spectra of AuNPs, P3HT, P3HT/AuNPs, PTh-PDI-DCP and PTh-PDI-DCP/AuNPs films.

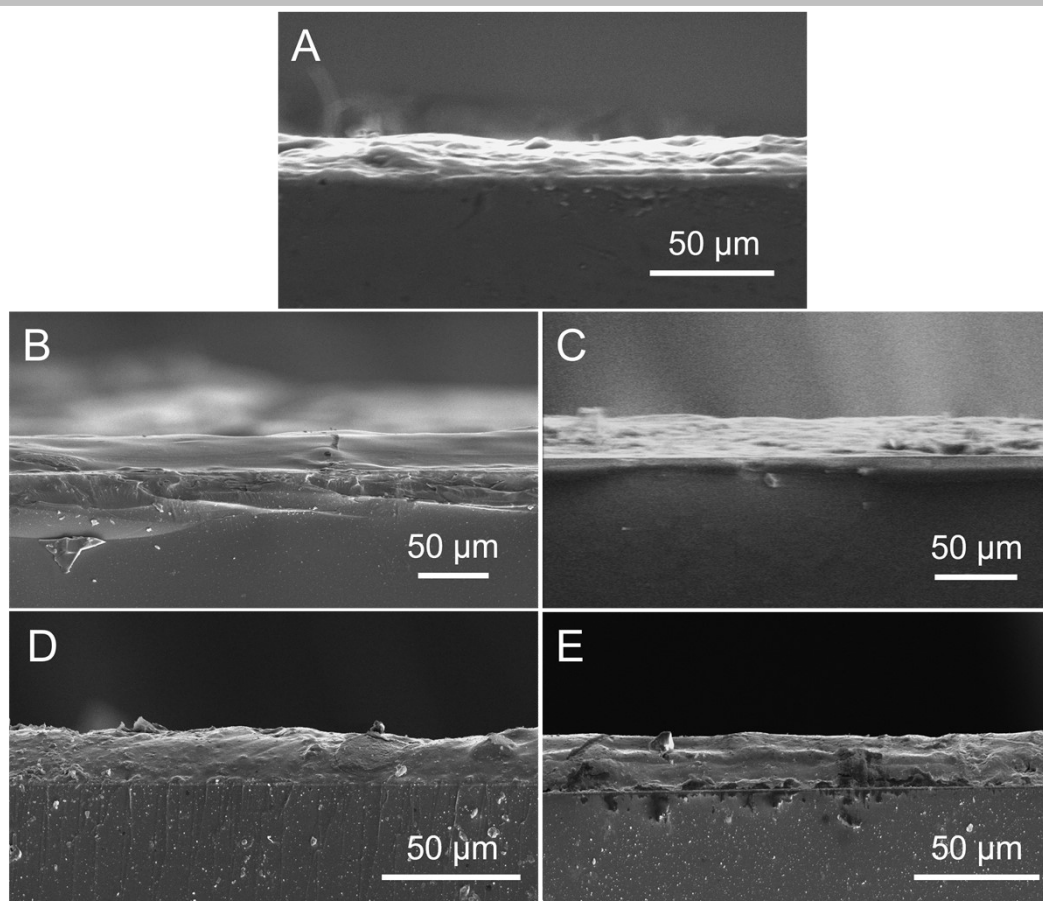

**Fig. S8** Cross-sectional SEM images showing the film thicknesses of (A) AuNPs, (B) P3HT, (C) P3HT/AuNPs, (D) PTh-PDI-DCP and (E) PTh-PDI-DCP/AuNPs thin films.

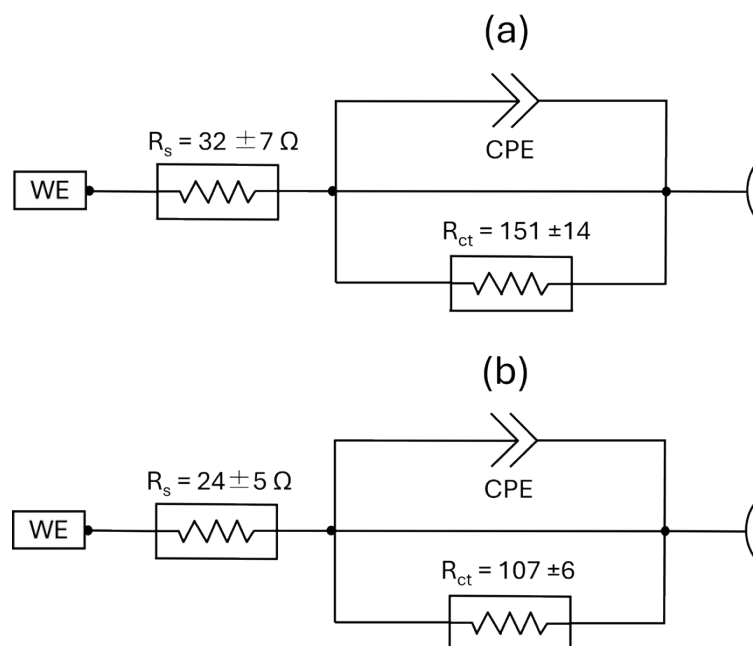

**Fig. S9** Diagrammatical representation of EIS circuit fitting from Nyquist plots (Fig. 3f) for the PTh-PDI-DCP/AuNPs in the dark (a) and under illumination (b).

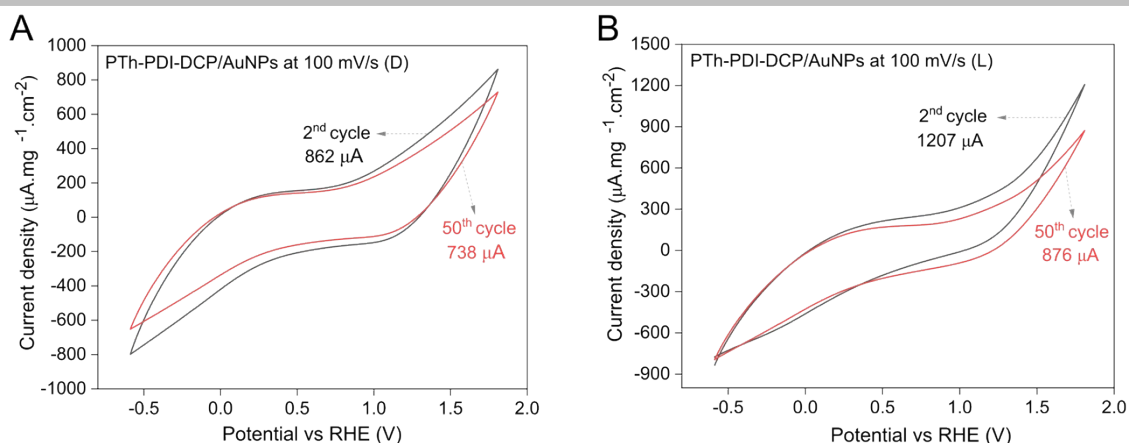

**Fig. S10** CVs of the PTh-PDI-DCP/AuNPs hybrid after 50 consecutive cycles recorded in the dark (A) and under illumination (B) which reveal a decrease in current density of ~14% and 27%, respectively, indicating the PTh-PDI-DCP/AuNPs hybrid performance degradation under both conditions.

#### 4. Photocatalytic H<sub>2</sub>O<sub>2</sub> production

Photocatalysts were loaded onto PVDF membranes following a previously reported protocol.<sup>1</sup> Photocatalytic activity was evaluated in a 25 mL single-neck round-bottom flask (RBF). A PVDF membrane coated with 0.5 mg of photocatalyst (dispersed in 300  $\mu\text{L}$  of  $\text{CHCl}_3$ ) and attached to a magnetic stirrer was placed in the flask, followed by the addition of 5 mL of DI water. The system was sealed with a rubber septum and purged with oxygen for 30 min prior to illumination. Photocatalytic reactions were conducted under Xe lamp (H11 xenon-simulated, high-performance halogen filament bulb, 75 W, 12 V), delivering a light intensity of 60  $\text{mW}/\text{cm}^2$  as measured with a flux meter, operated at full intensity for 1 h with continuous stirring. After irradiation, the photocatalyst-coated membrane was removed, thoroughly rinsed with DI water, and dried at 70  $^\circ\text{C}$  for subsequent reuse.

Quantification of hydrogen peroxide ( $\text{H}_2\text{O}_2$ ) was performed *via* iodometric titration. Briefly, 1 mL of 0.1 M potassium hydrogen phthalate (KHP) solution and 1 mL of 0.4 M potassium iodide (KI) solution were added to the reaction flask. The mixture was stirred at room temperature for 30 min during which photocatalytically generated  $\text{H}_2\text{O}_2$  oxidized iodide ( $\text{I}^-$ ) to triiodide ( $\text{I}_3^-$ ) under acidic conditions according to Eq. S3:

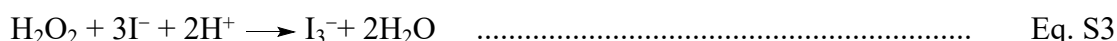

The concentration of  $\text{I}_3^-$  was determined by measuring its characteristic absorbance at 352 nm using UV/Vis spectroscopy. The corresponding  $\text{H}_2\text{O}_2$  concentration was calculated from a calibration curve prepared using standard  $\text{H}_2\text{O}_2$  solutions (0-100  $\mu\text{M}$ ) derived from a 35% w/w commercial stock (Fig. S12). For mechanistic studies of  $\text{H}_2\text{O}_2$  production, four photocatalyst-loaded PVDF membranes (weighed before and after loading using a Mettler Toledo METT-XPR36 microbalance), were individually placed in 25 mL RBFs containing 5 mL of DI water. Specific scavengers were introduced into separate flasks: *tert*-butanol (1 mL, 10 vol.%) as a hydroxyl radical scavenger, *para*-benzoquinone (*p*-BQ, 1 mL, 0.1 mM) to quench superoxide radicals ( $\text{O}_2^{\cdot-}$ ) and  $\text{AgNO}_3$  (1 mL, 1 mM) as an electron scavenger. One flask without any scavenger served as a control. All systems were purged with oxygen for 30 min and irradiated under the Xe-lamp for 1 h with continuous stirring. After illumination, the membranes were removed, and iodometric reagents (0.1 M KHP and 0.4 M KI) were added. Following 30 min of stirring at room temperature, absorbance at 352 nm was recorded and  $\text{H}_2\text{O}_2$  production was quantified against the calibration curve. This protocol enabled reproducible quantification of  $\text{H}_2\text{O}_2$  generation and provided mechanistic insights into the contribution of reactive species in the photocatalytic process highlighting the role of scavengers in elucidating electron, superoxide and hydroxyl radical pathways.

## SUPPORTING INFORMATION

### 5. ATR-FTIR spectra of the photocatalysts loaded on PVDF membranes

ATR-FTIR spectra of pristine PVDF membranes and photocatalyst-loaded PVDF membranes (AuNPs, P3HT, P3HT/AuNPs, PTh-PDI-DCP, and PTh-PDI-DCP/AuNPs) were recorded (Fig. S11). In the pristine PVDF membrane, characteristic absorption bands at  $1166\text{ cm}^{-1}$  and  $1233\text{ cm}^{-1}$  were assigned to C-F and C-CF<sub>2</sub> stretching vibrations, respectively. Upon incorporation of the photocatalysts, these bands decreased in intensity, while new absorption features corresponding to the chemical functionalities of the respective photocatalysts emerged. Notably, bands in the  $2800\text{--}3000\text{ cm}^{-1}$  region, attributed to C-H stretching vibrations and a distinct band near  $1700\text{ cm}^{-1}$ , corresponding to the carbonyl ( $>\text{C}=\text{O}$ ) stretching mode, confirmed successful deposition of the photocatalyst on the PVDF surface. The relatively low photocatalyst loading ( $\sim 0.1\text{ mg}$ ) resulted in these characteristic peaks appearing with reduced intensity.

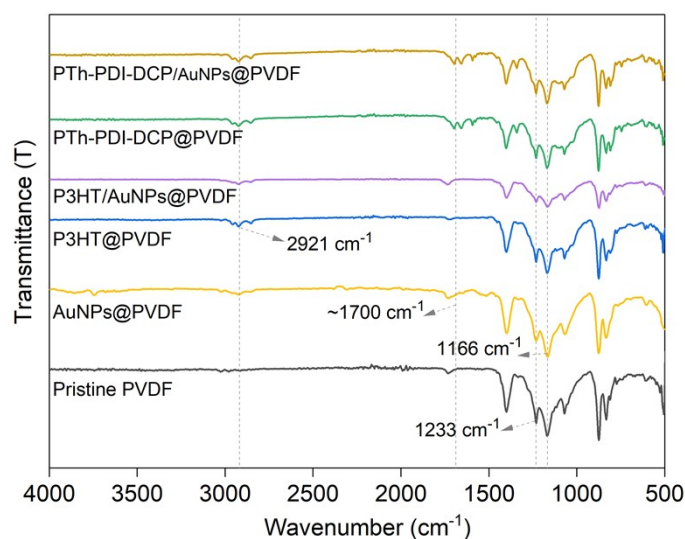

**Fig. S11** ATR-FTIR spectra of pristine porous PVDF membrane and PVDF membranes loaded with AuNPs, P3HT, P3HT/AuNPs, PTh-PDI-DCP and PTh-PDI-DCP/AuNPs.

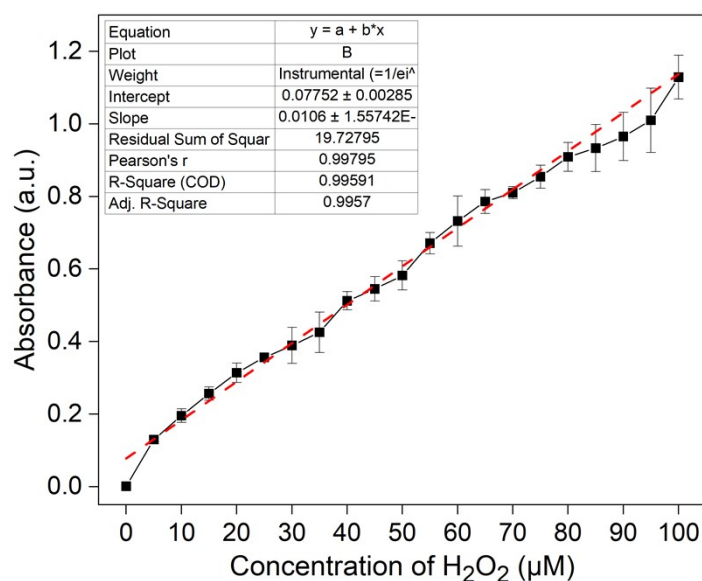

**Fig. S12** Calibration curve generated using known molar concentrations prepared from a 35% commercially available H<sub>2</sub>O<sub>2</sub> solution.

## SUPPORTING INFORMATION

**Table S2** H<sub>2</sub>O<sub>2</sub> is produced ( $\mu\text{Mmg}^{-1}\text{h}^{-1}$ ) by each photocatalyst over 10 photocatalytic cycles in triplicate.

| Photocatalyst                         | No. | AMOUNT<br>LOAD<br>ED<br>(MG) | 1   | 2   | 3   | 4   | 5   | 6   | 7  | 8   | 9   | 10 |
|---------------------------------------|-----|------------------------------|-----|-----|-----|-----|-----|-----|----|-----|-----|----|
| <b>AuNPs</b>                          | 1   | 0.11                         | 57  | 40  | 35  | 44  | 42  | 34  | 39 | 31  | 28  | 35 |
|                                       | 2   | 0.12                         | 66  | 40  | 39  | 63  | 53  | 38  | 41 | 34  | 30  | 34 |
|                                       | 3   | 0.12                         | 51  | 41  | 48  | 51  | 45  | 36  | 36 | 37  | 34  | 43 |
| Average H <sub>2</sub> O <sub>2</sub> |     |                              | 61  | 40  | 41  | 52  | 46  | 36  | 39 | 34  | 30  | 37 |
| SD ( $\pm$ )                          |     |                              | 6   | 1   | 5   | 8   | 5   | 2   | 2  | 3   | 2   | 4  |
| <b>P3HT</b>                           | 1   | 0.12                         | 66  | 74  | 103 | 81  | 84  | 88  | 56 | 60  | 48  | 43 |
|                                       | 2   | 0.11                         | 61  | 76  | 97  | 84  | 73  | 55  | 55 | 60  | 50  | 31 |
|                                       | 3   | 0.11                         | 68  | 72  | 107 | 81  | 88  | 75  | 51 | 57  | 46  | 37 |
| Average H <sub>2</sub> O <sub>2</sub> |     |                              | 65  | 74  | 102 | 82  | 82  | 73  | 54 | 59  | 48  | 37 |
| SD ( $\pm$ )                          |     |                              | 3   | 2   | 4   | 2   | 7   | 13  | 2  | 1   | 2   | 5  |
| <b>P3HT/AuNPs</b>                     | 1   | 0.12                         | 94  | 135 | 168 | 108 | 116 | 93  | 70 | 85  | 60  | 64 |
|                                       | 2   | 0.11                         | 88  | 135 | 157 | 102 | 113 | 91  | 61 | 70  | 60  | 68 |
|                                       | 3   | 0.11                         | 99  | 126 | 171 | 98  | 108 | 100 | 65 | 73  | 54  | 68 |
| Average H <sub>2</sub> O <sub>2</sub> |     |                              | 94  | 132 | 165 | 102 | 112 | 95  | 65 | 76  | 58  | 67 |
| SD ( $\pm$ )                          |     |                              | 4   | 4   | 6   | 4   | 3   | 4   | 4  | 6   | 3   | 2  |
| <b>PTh-PDI-DCP</b>                    | 1   | 0.13                         | 90  | 138 | 165 | 142 | 137 | 102 | 67 | 72  | 72  | 52 |
|                                       | 2   | 0.11                         | 97  | 160 | 172 | 138 | 125 | 117 | 61 | 73  | 82  | 56 |
|                                       | 3   | 0.14                         | 107 | 171 | 173 | 172 | 127 | 112 | 67 | 73  | 75  | 57 |
| Average H <sub>2</sub> O <sub>2</sub> |     |                              | 98  | 157 | 170 | 151 | 130 | 111 | 65 | 73  | 75  | 55 |
| SD ( $\pm$ )                          |     |                              | 7   | 14  | 4   | 15  | 5   | 6   | 3  | 2   | 5   | 2  |
| <b>PTh-PDI-DCP/AuNP</b>               | 1   | 0.13                         | 157 | 185 | 245 | 183 | 152 | 114 | 81 | 92  | 101 | 69 |
|                                       | 2   | 0.10                         | 122 | 160 | 238 | 181 | 157 | 126 | 80 | 101 | 116 | 77 |
|                                       | 3   | 0.12                         | 107 | 191 | 216 | 181 | 148 | 114 | 80 | 86  | 104 | 70 |

## SUPPORTING INFORMATION

|                                       |  |  |     |     |     |     |     |     |    |    |     |    |
|---------------------------------------|--|--|-----|-----|-----|-----|-----|-----|----|----|-----|----|
| Average H <sub>2</sub> O <sub>2</sub> |  |  | 129 | 178 | 233 | 182 | 152 | 118 | 80 | 93 | 107 | 72 |
| SD (±)                                |  |  | 21  | 13  | 12  | 1   | 4   | 6   | 0  | 6  | 7   | 4  |

**Table S3** Mechanistic studies for the artificial photosynthesis of H<sub>2</sub>O<sub>2</sub> during 5 repeated cycles in triplicates. Note: P is the photocatalytic production of H<sub>2</sub>O<sub>2</sub> in  $\mu\text{Mmg}^{-1}\text{h}^{-1}$  and M refers to the PVDF membrane.

| Photocatalyst            | Scavenger         | Amount loaded (mg) | (P1) | (P2) | (P3) | (P4) | (P5) | (P <sub>av</sub> ) |
|--------------------------|-------------------|--------------------|------|------|------|------|------|--------------------|
| <b>AuNPs</b>             | without scavenger | 0.12               | 21   | 21   | 15   | 16   | 16   | 18                 |
|                          | AgNO <sub>3</sub> | 0.11               | 7    | 7    | 7    | 7    | 7    | 7                  |
|                          | <i>p</i> -BQ      | 0.11               | 10   | 12   | 8    | 11   | 10   | 10                 |
|                          | <i>tert</i> -BuOH | 0.12               | 20   | 19   | 15   | 13   | 13   | 16                 |
| <b>P3HT</b>              | without scavenger | 0.10               | 22   | 29   | 39   | 32   | 24   | 29                 |
|                          | AgNO <sub>3</sub> | 0.12               | 9    | 9    | 19   | 11   | 7    | 11                 |
|                          | <i>p</i> -BQ      | 0.11               | 18   | 20   | 33   | 25   | 20   | 23                 |
|                          | <i>tert</i> -BuOH | 0.10               | 19   | 22   | 34   | 27   | 23   | 25                 |
| <b>P3HT/AuNPs</b>        | without scavenger | 0.10               | 32   | 50   | 70   | 43   | 32   | 45                 |
|                          | AgNO <sub>3</sub> | 0.11               | 13   | 15   | 24   | 16   | 11   | 16                 |
|                          | <i>p</i> -BQ      | 0.11               | 21   | 31   | 39   | 25   | 15   | 26                 |
|                          | <i>tert</i> -BuOH | 0.10               | 25   | 43   | 58   | 33   | 29   | 38                 |
| <b>PTh-PDI-DCP</b>       | without scavenger | 0.10               | 36   | 67   | 83   | 41   | 39   | 53                 |
|                          | AgNO <sub>3</sub> | 0.11               | 15   | 30   | 29   | 20   | 22   | 23                 |
|                          | <i>p</i> -BQ      | 0.11               | 25   | 47   | 48   | 27   | 24   | 34                 |
|                          | <i>tert</i> -BuOH | 0.11               | 25   | 42   | 42   | 23   | 27   | 32                 |
| <b>PTh-PDI-DCP/AuNPs</b> | without scavenger | 0.10               | 62   | 135  | 180  | 100  | 67   | 109                |
|                          | AgNO <sub>3</sub> | 0.11               | 22   | 41   | 40   | 31   | 26   | 32                 |
|                          | <i>p</i> -BQ      | 0.12               | 26   | 76   | 85   | 51   | 35   | 55                 |
|                          | <i>tert</i> -BuOH | 0.11               | 35   | 80   | 97   | 51   | 40   | 61                 |

## SUPPORTING INFORMATION

**Table S4** The percentage (%) decrease in H<sub>2</sub>O<sub>2</sub> concentration was determined based on mechanistic studies of H<sub>2</sub>O<sub>2</sub>. Note: % refers to decrease in the photocatalytic production of H<sub>2</sub>O<sub>2</sub> and M refers to the PVDF membrane.

| Photocatalyst     | Scavenger         | (%-1) | (%-2) | (%-3) | (%-4) | (%-5) | % <sub>av</sub> + SD |
|-------------------|-------------------|-------|-------|-------|-------|-------|----------------------|
| AuNPs             | without scavenger |       |       |       |       |       |                      |
|                   | AgNO <sub>3</sub> | 65    | 69    | 55    | 57    | 60    | 61 ±5                |
|                   | <i>p</i> -BQ      | 51    | 42    | 49    | 33    | 40    | 43 ±6                |
|                   | <i>tert</i> -BuOH | 4     | 12    | 4     | 18    | 18    | 11 ±6                |
| P3HT              | without scavenger |       |       |       |       |       |                      |
|                   | AgNO <sub>3</sub> | 62    | 67    | 51    | 66    | 70    | 63 ±7                |
|                   | <i>p</i> -BQ      | 18    | 28    | 15    | 20    | 18    | 20 ±5                |
|                   | <i>tert</i> -BuOH | 13    | 22    | 12    | 14    | 2     | 13 ±6                |
| P3HT/AuNPs        | without scavenger |       |       |       |       |       |                      |
|                   | AgNO <sub>3</sub> | 59    | 71    | 65    | 64    | 65    | 65 ±4                |
|                   | <i>p</i> -BQ      | 33    | 37    | 44    | 43    | 55    | 42 ±7                |
|                   | <i>tert</i> -BuOH | 20    | 14    | 18    | 24    | 8     | 17 ±5                |
| PTh-PDI-DCP       | without scavenger |       |       |       |       |       |                      |
|                   | AgNO <sub>3</sub> | 59    | 56    | 65    | 50    | 44    | 55 ±7                |
|                   | <i>p</i> -BQ      | 31    | 30    | 43    | 35    | 39    | 36 ±5                |
|                   | <i>tert</i> -BuOH | 31    | 37    | 50    | 44    | 32    | 39 ±7                |
| PTh-PDI-DCP/AuNPs | without scavenger |       |       |       |       |       |                      |
|                   | AgNO <sub>3</sub> | 65    | 70    | 78    | 69    | 61    | 68 ±5                |
|                   | <i>p</i> -BQ      | 58    | 44    | 53    | 49    | 47    | 50 ±5                |
|                   | <i>tert</i> -BuOH | 43    | 41    | 46    | 49    | 40    | 44 ±3                |

**Table S5** List of reported photocatalysts and their photocatalytic activity for the hydrogen peroxide (H<sub>2</sub>O<sub>2</sub>) production.

| Catalyst                                   | Catalyst Loading    | Irradiation Source                                                | Irradiation time | H <sub>2</sub> O <sub>2</sub> production (reported units) | H <sub>2</sub> O <sub>2</sub> production (In $\mu\text{M}\cdot\text{mg}^{-1}\cdot\text{h}^{-1}$ ) | Reference              |
|--------------------------------------------|---------------------|-------------------------------------------------------------------|------------------|-----------------------------------------------------------|---------------------------------------------------------------------------------------------------|------------------------|
| RF-P3HT (doping)                           | 50 mg / 30 mL water | Xe lamp, light intensity at 420–700 nm: 210 Wm <sup>-2</sup>      | 6 h              | 98 $\mu\text{mol}$                                        | 10.9                                                                                              | Reference <sup>2</sup> |
| Rf@ NF 1.0 (resin)                         | 50 mg / 30 mL water | $\lambda > 420$ nm (SS-1 Sun)                                     | 24 h             | 186 $\mu\text{mol}$                                       | 5.2                                                                                               | Reference <sup>3</sup> |
| COF-TfpBpy                                 | 15 mg / 10 mL water | $\lambda > 420$ nm (298 K; xenon lamp, 40.8 mW cm <sup>-2</sup> ) | 1 h              | 710 $\mu\text{mol}$                                       | 4733                                                                                              | Reference <sup>4</sup> |
| COF-UCN-DTDA                               | 20 mg / 20mL water  | SS (1-Sun)                                                        | 1 h              | 7.3 mmolg <sup>-1</sup>                                   | 365                                                                                               | Reference <sup>5</sup> |
| g-C <sub>3</sub> N <sub>4</sub> /500-85 °C | 30 mg / 30 mL water | Xe (visible light)                                                | 7 h              | 213 $\mu\text{mol}$                                       | 33.8                                                                                              | Reference <sup>6</sup> |

## SUPPORTING INFORMATION

|                                                                             |                                                        |                                                 |                          |                                           |                                            |                            |
|-----------------------------------------------------------------------------|--------------------------------------------------------|-------------------------------------------------|--------------------------|-------------------------------------------|--------------------------------------------|----------------------------|
| <b>g-C<sub>3</sub>N<sub>4</sub> (CNOP)</b>                                  | 20 mg / 40 mL water                                    | 300-W Xe arc lamp (Oriental)                    | 12 h                     | 316 μmol                                  | 32.9                                       | Reference <sup>7</sup>     |
| <b>g-C<sub>3</sub>N<sub>4</sub>/PDI</b>                                     | 50 mg / 30 mL water                                    | 2 kW Xe lamp (USHIO Inc.)                       | 12 h                     | 42 μmol                                   | 2.4                                        | Reference <sup>8</sup>     |
| <b>g-C<sub>3</sub>N<sub>4</sub>/BDI<sub>50</sub></b>                        | 100 mg                                                 | Xe-lamp 27.3 W.m <sup>-2</sup>                  | 36 h                     | 118 μmol                                  | 1.9                                        | Reference <sup>9, 10</sup> |
| <b>g-C<sub>3</sub>N<sub>4</sub>/PDI/rGO</b>                                 | 50 mg / 30 mL water                                    | Xe lamp, light intensity 43.3 W.m <sup>-2</sup> | 24 h                     | 28 μmol                                   | 0.8                                        | Reference <sup>11</sup>    |
| <b>C-modified g-C<sub>3</sub>N<sub>4</sub></b>                              | 30 mg / 30mL water                                     | 300 W Xenon lamp                                | 2 h                      | 210 μmol                                  | 116.6                                      | Reference <sup>12</sup>    |
| <b>Ti<sub>3</sub>C<sub>2</sub>/g-C<sub>3</sub>N<sub>4</sub></b>             | 50 mg / 50 mL water                                    | 300 W Xe-lamp                                   | 1 h                      | 140 μmol                                  | 56                                         | Reference <sup>13</sup>    |
| <b>CDs/HgLI</b>                                                             | 10 mg / 50 mL water for 4 h                            | Xe (350 W)                                      | 1 h                      | 800 μmolh <sup>-1</sup> g <sup>-1</sup>   | 1.6                                        | Reference <sup>14</sup>    |
| <b>CdS-PDA</b>                                                              | 100 mg / 95 mL water                                   | Xe lamp (λ > 420 nm)                            | 24 h                     | 3.84 mM                                   | 16.8                                       | Reference <sup>15</sup>    |
| <b>CN/rGO@BPODs</b>                                                         | 100 mg / 100 mL water                                  | 300 W Xe-lamp                                   | 1 h                      | 60.6 μmol                                 | 6.1                                        | Reference <sup>16</sup>    |
| <b>g-C<sub>3</sub>N<sub>4</sub>/PDI-BN<sub>0.2</sub>-rGO<sub>0.05</sub></b> | 250 mg / 50 mL water                                   | irradiation of AM 1.5 G simulated sunlight      | 1 h                      | 26 μmol                                   | 2.1                                        | Reference <sup>8</sup>     |
| <b>GO</b>                                                                   | 32 mg / 100 mL water                                   | 1.5 kW xenon arc lamp                           | 6 h                      | 202 μmol                                  | 10.5                                       | Reference <sup>17</sup>    |
| <b>g-C<sub>3</sub>N<sub>4</sub>/MTI</b>                                     | 100 mg in 100 mL water                                 | solar simulator under AM 1.5G (1-sun)           | 58 h                     | 52 μmolh <sup>-1</sup>                    | 5.2                                        | Reference <sup>10</sup>    |
| <b>P3HT 7.0 pH</b>                                                          | 0.4 mL NPs sol / 30 nmols in water                     | SS (1-Sun)                                      | 20 h                     | 99 μmol                                   | 4.95 μmol.h <sup>-1</sup>                  | Reference <sup>18</sup>    |
| <b>CoPc-BTM-COF</b>                                                         | 100 mg / 50 mL water                                   | AM 1.5 G (SS)                                   | 1 h                      | 1250 μmol                                 | 250                                        | Reference <sup>19</sup>    |
| <b>CHF-DPDA</b>                                                             | In 100 mL water                                        | visible-light irradiation (λ > 420 nm)          | 16 h                     | 69 μmolh <sup>-1</sup>                    | 690                                        | Reference <sup>20</sup>    |
| <b>TTF-BT-COF</b>                                                           | In 100 mL water                                        | AM 1.5 G sunlight                               | 1 h                      | 276 000 μMh <sup>-1</sup> g <sup>-1</sup> | 276                                        | Reference <sup>21</sup>    |
| <b>CTF-BDDBN</b>                                                            | 30 mg / 50 mL water                                    | AM1.5G sunlight irradiation (λ > 420 nm)        | 24 h                     | 82 μM                                     | 2.27                                       | Reference <sup>22</sup>    |
| <b>pTh-BTD/FTO</b>                                                          | electrodeposited material                              | Irradiation (100 mW.cm <sup>-2</sup> )          | 8 h (photo-electrolysis) | ~ 3000 μM                                 | 375 μM.h <sup>-1</sup>                     | Reference <sup>23</sup>    |
| <b>Nv-CN</b>                                                                | 50 mL water                                            | AM 1.5 G sunlight                               | 12 h                     | 3093 μmolg <sup>-1</sup> h <sup>-1</sup>  | 5.2                                        | Reference <sup>24</sup>    |
| <b>Anthraquinone-resorcinol</b>                                             | AQ-Re nanoparticles in water                           | SS (1-Sun)                                      | 20 h                     | 6097 μmolg <sup>-1</sup> h <sup>-1</sup>  | 6.1 μmol.mg <sup>-1</sup> .h <sup>-1</sup> | Reference <sup>25</sup>    |
| <b>Pigment semiconductors (EPI), (QNC)</b>                                  | photocathodic H <sub>2</sub> O <sub>2</sub> production | 60 mW.cm <sup>-2</sup> light from halogen bulb  | 48 h                     | 3000 μMmg <sup>-1</sup> h <sup>-1</sup>   | 3000                                       | Reference <sup>26</sup>    |
| <b>CoO<sub>x</sub>/Mo:BiVO<sub>4</sub>/Pd</b>                               | 50 mg / 50 mL water                                    | SS (1-Sun)                                      | 1 h                      | 58.33 μmolg <sup>-1</sup> h <sup>-1</sup> | 1.2                                        | Reference <sup>27</sup>    |
| <b>rGO@MRF-x</b>                                                            | 400 mg / 150 mL water                                  | AM1.5G simulated sunlight (1 sun) irradiation   | 1 h                      | 481 μmol                                  | 8                                          | Reference <sup>28</sup>    |
| <b>G-C<sub>3</sub>N<sub>4</sub>/500-85°C/3h</b>                             | pure water<br>30 mg / 50 mL water                      | AM1.5G sunlight irradiation (λ > 420 nm)        | 7 h                      | 6.4 μMg <sup>-1</sup> h <sup>-1</sup>     | 0.0064                                     | Reference <sup>6</sup>     |
| <b>PANI/PDI</b>                                                             | 10 mg / 1L water                                       | simulated AM1.5G sunlight                       | 1 h                      | 104 μmolh <sup>-1</sup> g <sup>-1</sup>   | 10.4                                       | Reference <sup>29</sup>    |

## SUPPORTING INFORMATION

|                                                      |                                                                          |                                                                       |      |                                                                                   |            |                         |
|------------------------------------------------------|--------------------------------------------------------------------------|-----------------------------------------------------------------------|------|-----------------------------------------------------------------------------------|------------|-------------------------|
| <b>Cg-C<sub>3</sub>N<sub>4</sub></b>                 | 20 mg powder dispersed in 15 mL H <sub>2</sub> O                         | visible light irradiation ( $\lambda \geq 420$ nm)                    | 3 h  | 1111.89 $\mu\text{mol h}^{-1}\text{g}^{-1}$                                       | 74.0       | Reference <sup>30</sup> |
| <b>OPCN</b>                                          | In 50 mL (25 mg PC) water (2,4-dichlorophenol SA)                        | AM1.5G sunlight irradiation ( $\lambda > 420$ nm)                     | 1 h  | 360 $\mu\text{mol h}^{-1}\text{g}^{-1}$                                           | 7.2        | Reference <sup>31</sup> |
| <b>Polymer (DE7)</b>                                 | 5 mg catalyst in 3 mL water                                              | simulated AM1.5G sunlight                                             | 1 h  | 1190 $\mu\text{mol h}^{-1}\text{g}^{-1}$                                          | 396        | Reference <sup>32</sup> |
| <b>Ni-CAT-CN60</b>                                   | In pure water                                                            | 300 W Xe-lamp                                                         | 4 h  | 110 $\mu\text{Mg}^{-1}\text{h}^{-1}$                                              | 0.11       | Reference <sup>33</sup> |
| <b>(MTI), (BDI), (BDI), PDI</b>                      | In 50 mL water                                                           | Xe lamp (100 W)                                                       | 1 h  | 10 $\mu\text{mol h}^{-1}\text{g}^{-1}$ - 1610 $\mu\text{mol h}^{-1}\text{g}^{-1}$ | 0.2 - 32.2 | Reference <sup>18</sup> |
| <b>(CHFs),DPDA</b>                                   | In 50 mL water                                                           | AM1.5G sunlight irradiation ( $\lambda > 420$ nm)                     | 1 h  | 1733 $\mu\text{mol h}^{-1}\text{g}^{-1}$                                          | 34.7       | Reference <sup>20</sup> |
| <b>PTA0.6/CN</b>                                     | 50 mg / 30 mL water                                                      | SS (1-Sun)                                                            | 12 h | 1833 $\mu\text{mol g}^{-1}\text{h}^{-1}$                                          | 61.1       | Reference <sup>34</sup> |
| <b>Polyethylenimine/g-C<sub>3</sub>N<sub>4</sub></b> | In water 10 mL / 10 mg catalyst                                          | $\lambda > 420$ nm (SS-1sun)                                          | 1 h  | 60 $\mu\text{Mg}^{-1}\text{h}^{-1}$                                               | 0.06       | Reference <sup>35</sup> |
| <b>RF-(COOH)<sub>2</sub>-523</b>                     | 50 mg / 30 mL water                                                      | visible-light irradiation ( $\lambda > 420$ nm)                       | 24 h | 60 $\mu\text{mol}$                                                                | 1.7        | Reference <sup>36</sup> |
| <b>RF-NH<sub>3</sub>-523</b>                         | In DI water                                                              | SS (1-Sun)                                                            | 8 h  | 108 $\mu\text{Mg}^{-1}\text{h}^{-1}$                                              | 0.11       | Reference <sup>37</sup> |
| <b>CdS/COF</b>                                       | 2 mg/mL of water                                                         | simulated sunlight or visible light ( $\lambda \geq 400$ nm)          | 6 h  | 608.41 $\mu\text{mol L}^{-1}$                                                     | 50.7       | Reference <sup>38</sup> |
| <b>rGO/TiO<sub>2</sub> (10 wt%)</b>                  | 0.5 g/L of photocatalyst, 5 vol% of 2-propanol, pH = 3.0                 | UV light irradiation ( $\lambda \geq 320$ nm)                         | 3 h  | 889 $\mu\text{mol g}^{-1}\text{h}^{-1}$                                           | 8.89       | Reference <sup>39</sup> |
| <b>PTh-PDI-DCP</b>                                   | ~0.1 mg catalyst loaded on porous hydrophobic PVDF membrane / 5 mL water | Xe-lamp white-blue light with light intensity ~100 $\text{mWcm}^{-2}$ | 1 h  | 215.8 $\mu\text{Mmg}^{-1}\text{h}^{-1}$                                           | 215.8      | Reference <sup>1</sup>  |
| <b>P3HT-<i>b</i>-poly(3HT-co-Th/PDI)</b>             | ~0.1 mg catalyst loaded on porous hydrophobic PVDF membrane / 5 mL water | Xe-lamp (250-850 nm), (75 W), light intensity ~60 $\text{mWcm}^{-2}$  | 1 h  | 122.5 $\mu\text{Mmg}^{-1}\text{h}^{-1}$                                           | 122.5      | Reference <sup>40</sup> |
| <b>PTh-PDI-DCP</b>                                   | ~0.1 mg catalyst loaded on porous hydrophobic PVDF membrane / 5 mL water | Xe-lamp (250-850 nm), (75 W), light intensity ~60 $\text{mWcm}^{-2}$  | 1 h  | 120.4 $\mu\text{Mmg}^{-1}\text{h}^{-1}$                                           | 120.4      | <b>Our work</b>         |
| <b>PTh-PDI-DCP/rGO</b>                               | ~0.1 mg catalyst loaded on porous hydrophobic PVDF membrane / 5 mL water | Xe-lamp (250-850 nm), (75 W), light intensity ~60 $\text{mWcm}^{-2}$  | 1 h  | 193.6 $\mu\text{Mmg}^{-1}\text{h}^{-1}$                                           | 193.6      | <b>Our work</b>         |
| <b>PTh-PDI-DCP/AuNPs</b>                             | ~0.1 mg catalyst loaded on porous hydrophobic PVDF membrane / 5 mL water | Xe-lamp (250-850 nm), (75 W), light intensity ~60 $\text{mWcm}^{-2}$  | 1 h  | 233 $\mu\text{Mmg}^{-1}\text{h}^{-1}$                                             | 233        | <b>This work</b>        |

## 6. References

1. S. Iqbal, F. Akbar, M. A. Salar, T. S. Butt, A. A. Khan, M. Sohail and B. Yameen, *ACS Applied Materials & Interfaces*, 2025, **17**, 28609-28621.
2. Y. Shiraishi, M. Matsumoto, S. Ichikawa, S. Tanaka and T. Hirai, *Journal of the American Chemical Society*, 2021, **143**, 12590-12599.
3. Y. Shiraishi, M. Jio, K. Yoshida, Y. Nishiyama, S. Ichikawa, S. Tanaka and T. Hirai, *JACS Au*, 2023, **3**, 2237-2246.
4. M. Kou, Y. Wang, Y. Xu, L. Ye, Y. Huang, B. Jia, H. Li, J. Ren, Y. Deng and J. Chen, *Angewandte Chemie International Edition*, 2022, **61**, e202200413.
5. P. Sha, L. Huang, J. Zhao, Z. Wu, Q. Wang, L. Li, D. Bu and S. Huang, *ACS Catalysis*, 2023, **13**, 10474-10486.
6. B. Liu, J. Du, G. Ke, B. Jia, Y. Huang, H. He, Y. Zhou and Z. Zou, *Advanced Functional Materials*, 2022, **32**, 2111125.
7. L. Sun, P. Li, Z. Shen, Y. Pang, X. Ma, D. Qu, L. An and Z. Sun, *Advanced Energy and Sustainability Research*, 2023, **4**, 2300090.
8. Y. Kofuji, Y. Isobe, Y. Shiraishi, H. Sakamoto, S. Ichikawa, S. Tanaka and T. Hirai, *ChemCatChem*, 2018, **10**, 2070-2077.
9. S. Chu, Y. Pan, Y. Wang, H. Zhang, R. Xiao and Z. Zou, *Journal of Materials Chemistry A*, 2020, **8**, 14441-14462.
10. Y. Kofuji, S. Ohkita, Y. Shiraishi, H. Sakamoto, S. Ichikawa, S. Tanaka and T. Hirai, *ACS Sustainable Chemistry & Engineering*, 2017, **5**, 6478-6485.
11. Y. Kofuji, Y. Isobe, Y. Shiraishi, H. Sakamoto, S. Tanaka, S. Ichikawa and T. Hirai, *Journal of the American Chemical Society*, 2016, **138**, 10019-10025.
12. T. Wang, N. Song, S. Yao, Y. Wang, Q. Wang and H. Yu, *Chemical Engineering Journal*, 2024, **495**, 153379.
13. Y. Yang, Z. Zeng, G. Zeng, D. Huang, R. Xiao, C. Zhang, C. Zhou, W. Xiong, W. Wang and M. Cheng, *Applied Catalysis B: Environmental*, 2019, **258**, 117956.
14. Y. Zhao, L. Xu, X. Wang, Z. Wang, Y. Liu, Y. Wang, Q. Wang, Z. Wang, H. Huang and Y. Liu, *Nano Today*, 2022, **43**, 101428.
15. Z. Wei, S. Zhao, W. Li, X. Zhao, C. Chen, D. L. Phillips, Y. Zhu and W. Choi, *ACS Catalysis*, 2022, **12**, 11436-11443.
16. J. Xiong, X. Li, J. Huang, X. Gao, Z. Chen, J. Liu, H. Li, B. Kang, W. Yao and Y. Zhu, *Applied Catalysis B: Environmental*, 2020, **266**, 118602.
17. W.-C. Hou and Y.-S. Wang, *ACS Sustainable Chemistry & Engineering*, 2017, **5**, 2994-3001.
18. H. Cheng, J. Cheng, L. Wang and H. Xu, *Chemistry of Materials*, 2022, **34**, 4259-4273.
19. Q. Zhi, W. Liu, R. Jiang, X. Zhan, Y. Jin, X. Chen, X. Yang, K. Wang, W. Cao and D. Qi, *Journal of the American Chemical Society*, 2022, **144**, 21328-21336.
20. H. Cheng, H. Lv, J. Cheng, L. Wang, X. Wu and H. Xu, *Advanced Materials*, 2022, **34**, 2107480.
21. J. N. Chang, Q. Li, J. W. Shi, M. Zhang, L. Zhang, S. Li, Y. Chen, S. L. Li and Y. Q. Lan, *Angewandte Chemie*, 2023, **135**, e202218868.
22. L. Chen, L. Wang, Y. Wan, Y. Zhang, Z. Qi, X. Wu and H. Xu, *Advanced Materials*, 2020, **32**, 1904433.
23. R. Gańczarczyk, R. Rybakiewicz-Sekita, M. Gryszel, J. Drapała, M. Zagórska and E. D. Głowacki, *Advanced Materials Interfaces*, 2023, **10**, 2300270.
24. R. Ji, Y. Dong, X. Sun, C. Pan, Y. Yang, H. Zhao and Y. Zhu, *Applied Catalysis B: Environment and Energy*, 2024, **349**, 123884.
25. A. V. Munde, D. M. Sanke, N. G. Ghosh, J. Bezboruah, S. Roy and S. S. Zade, *Journal of Materials Chemistry A*, 2024, **12**, 18433-18439.
26. M. Jakešová, D. H. Apaydin, M. Sytnyk, K. Oppelt, W. Heiss, N. S. Sariciftci and E. D. Głowacki, *Advanced Functional Materials*, 2016, **26**, 5248-5254.

## SUPPORTING INFORMATION

---

27. A. Turunen, 2023.
28. Q. Tian, X. K. Zeng, C. Zhao, L. Y. Jing, X. W. Zhang and J. Liu, *Advanced Functional Materials*, 2023, **33**, 2213173.
29. W. Dai, L. Jiang, J. Wang, Y. Pu, Y. Zhu, Y. Wang and B. Xiao, *Chemical Engineering Journal*, 2020, **397**, 125476.
30. J. Liang, X. Yang, Y. Wang, P. He, H. Fu, Y. Zhao, Q. Zou and X. An, *Journal of Materials Chemistry A*, 2021, **9**, 12898-12922.
31. F. Wang, J. Xu, Z. Wang, Y. Lou, C. Pan and Y. Zhu, *Applied Catalysis B: Environmental*, 2022, **312**, 121438.
32. L. Liu, M.-Y. Gao, H. Yang, X. Wang, X. Li and A. I. Cooper, *Journal of the American Chemical Society*, 2021, **143**, 19287-19293.
33. Y. Zhao, Y. Liu, Z. Wang, Y. Ma, Y. Zhou, X. Shi, Q. Wu, X. Wang, M. Shao and H. Huang, *Applied Catalysis B: Environmental*, 2021, **289**, 120035.
34. J. Cao, Q. Wu, Y. Zhao, K. Wei, Y. Li, X. Wang, F. Liao, H. Huang, M. Shao and Y. Liu, *Applied Catalysis B: Environmental*, 2021, **285**, 119817.
35. J. Yan, X. Song, B. Jin and R. Peng, *New Journal of Chemistry*, 2021, **45**, 14655-14664.
36. Y. Shiraishi, T. Hagi, M. Matsumoto, S. Tanaka, S. Ichikawa and T. Hirai, *Communications Chemistry*, 2020, **3**, 169.
37. Y. Shiraishi, T. Takii, T. Hagi, S. Mori, Y. Kofuji, Y. Kitagawa, S. Tanaka, S. Ichikawa and T. Hirai, *Nature materials*, 2019, **18**, 985-993.
38. Y. He, J. Zhao, Y.-T. Sham, S. Gao, M. Pan, Q. Chen, G. Huang, P. K. Wong and J. Bi, *ACS Sustainable Chemistry & Engineering*, 2023, **11**, 17552-17563.
39. D. Kong, M. Zhao, S. Li, F. Huang, J. Song, Y. Yuan, Y. Shen and A. Xie, *Nano*, 2016, **11**, 1650007.
40. F. Akbar, S. Iqbal, A. Sohail, S. Çitoğlu, H. Duran and B. Yameen, *ACS Applied Energy Materials*, 2025.
